# Supplementary material for: Sox7 controls arterial specification in conjunction withhey2andefnb2function
Source: Oxford University Press journal article supplement (doi:10.1242/dev.117275), 2015-01-01

**Fig. S1 Sequence of the *sox7<sup>hu5626</sup>* allele.** Chromatogram of part of the *sox7* sequence comprising the site of the non-sense mutation (GTG>GTA, red arrow) in a heterozygous (middle panel) and homozygous mutant *sox7<sup>hu5626</sup>* embryo (bottom panel).

**Fig. S2 RT-PCR of the *sox7<sup>hu5626</sup>* allele** (S2A) *sox7* cDNA fragment of 10 pooled embryos with normal circulation (Sib.) and 10 pooled embryos with short loop phenotype (Mut.) at 2dpf. Left lane is 1kb DNA Ladder. Fragment size 1274 basepairs. (S2B) Part of *sox7<sup>hu5626</sup>* cDNA sequence, upper (white) panel *sox7<sup>hu5626</sup>* mutants and lower (yellow) panel *sox7<sup>hu5626</sup>* siblings. Red arrow indicates G to A mutation site in *sox7* mutants.

**Fig. S3 Indication of the relative positions of cross-sections shown in Fig.2B.** Dorsal view of the head region of a *kdrl:eGFP* wild-type embryo highlighting (dotted red lines) the relative positions of cross-sections in Fig. 2B. First cross-section at location of bilateral aorta, second cross-section at location of bilateral aortae fusion in a single aorta, third section at the position just posterior to the aortae fusion and fourth section in the anterior part of the DA.

**Fig. S4 Endothelial *sox17:eGFP* expression is indistinguishable between *sox7* mutants and siblings, and is detectable in the DA and ISVs but not in LDA cells.** (S4A) Lateral view of trunk region of *kdrl:mCherry;sox17:eGFP*-positive *sox7* mutants and siblings at 2 dpf. *sox17:eGFP* is expressed in the DA and ISVs, but not in the PCV and is indistinguishable between *sox7* mutants and siblings. (S4B) Dorsal view of the head region of *kdrl:mCherry;sox17:eGFP*-positive *sox7* siblings and mutants at 2 dpf. LDA cells do not express detectable levels of the transgenic reporter line in both *sox7* siblings and mutants. Pictures in S4A and B are taken with same laser intensity and settings. (L)DA = (lateral) dorsal aorta, PCV = posterior cardinal vein, ISV = intersegmental vessel

**Fig. S5 *dll4:Gal4FF;UAS:RFP* is expressed specifically in arterial endothelial cells.** (S5A) Lateral view of the trunk region of *dll4:Gal4FF;UAS:RFP;flt4:mCitrine*-positive embryos at 25 hpf, 50 hpf and 5 dpf. (S5B) Dorsal view of the head region of *dll4:Gal4FF;UAS:RFP;flt4:mCitrine*-positive embryos at 25 hpf and 50 hpf. Right panels only *dll4:gal4FF;UAS:RFP* channel. Note *dll4:gal4FF;UAS:RFP* expression in the arteries (DA and LDA) but not within venous ECs (PCV and CCV). (L)DA = lateral dorsal aorta, PCV = posterior cardinal vein, CCV = common cardinal vein

**Suppl. Movie 1 and 2** Brightfield movies of the head region (1A, 2A) and trunk region (1B, 2B) of *sox7* sibling (Movie 1) and mutant (Movie 2) embryos at 2.5dpf, timeframe of 5 seconds, 10x objective.

**Suppl. Movie 3 and 4** Confocal time lapse movies of *kdr1:eGFP*-positive cells in the head region of a *sox7* sibling (Movie 3) and mutant (Movie 4) starting at the 20-somite stage; 1 timeframe per hour, 10x objective. Red lines outline the arterial cells, blue lines the venous cells. Green arrow indicates position of ectopic connection between arterial and venous ECs in *sox7* mutants.

### Supplementary Table S1. Primers

| Primer name   | Sequence                                                   |
|---------------|------------------------------------------------------------|
| Sox7_wt       | GAA GGT GAC CAA GTT CAT GCT GAA CGC CTT CAT GGT GTG        |
| Sox7_mut      | GAA GGT CGG AGT CAA CGG ATT GAA CGC CTT CAT GGT GTA        |
| Sox7_common   | CGA GTC TCT TGC GCT CAT CTT                                |
| Efnb2a_wt     | GAA GGT GAC CAA GTT CAT GCT CTC TGG AAC AGC TAA AGT CCTGT  |
| Efnb2a_mut    | GAA GGT CGG AGT CAA CGG ATT CTC TGG AAC AGC TAA AGT CCTGA  |
| Efnb2a_common | AGT AGA GGC GTG TCT GCT TTT                                |
| Efnb2b_wt     | GAA GGT GAC CAA GTT CAT GCT CGA GTT GTT CTT TGG GAA CAA GA |
| Efnb2b_mut    | GAA GGT CGG AGT CAA CGG ATT CGA GTT GTT CTT TGG GAA CAA GT |
| Efnb2b_common | CTC CAC TGA GCA GAC GAA CAT                                |
| Hey2_ex2_Fw   | TGTGAATGTGACGGATGTGA                                       |
| Hey2_ex2_Rv   | TCCGGTCCCTTCTTCTTTT                                        |
| Sox7_5'UTR_Fw | GCCCGAGAAACAAAGTTTGAG                                      |
| Sox7_3'UTR_Rv | CATGATGAGCCCACAGTCTC                                       |

## Supplementary Figures

Fig. S1

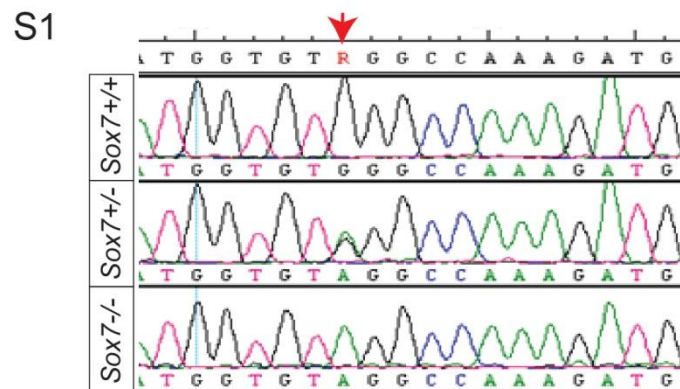

Fig. S2

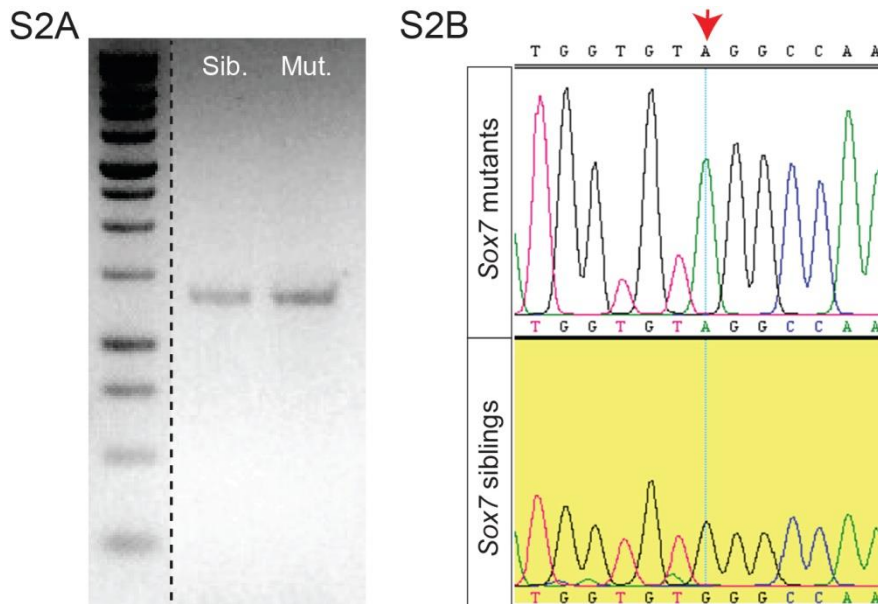

**Fig. S3**

S3

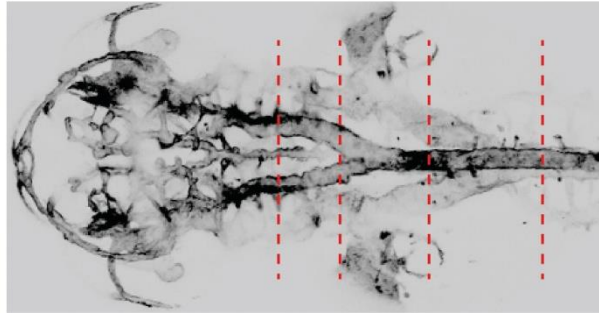

Fig. S4

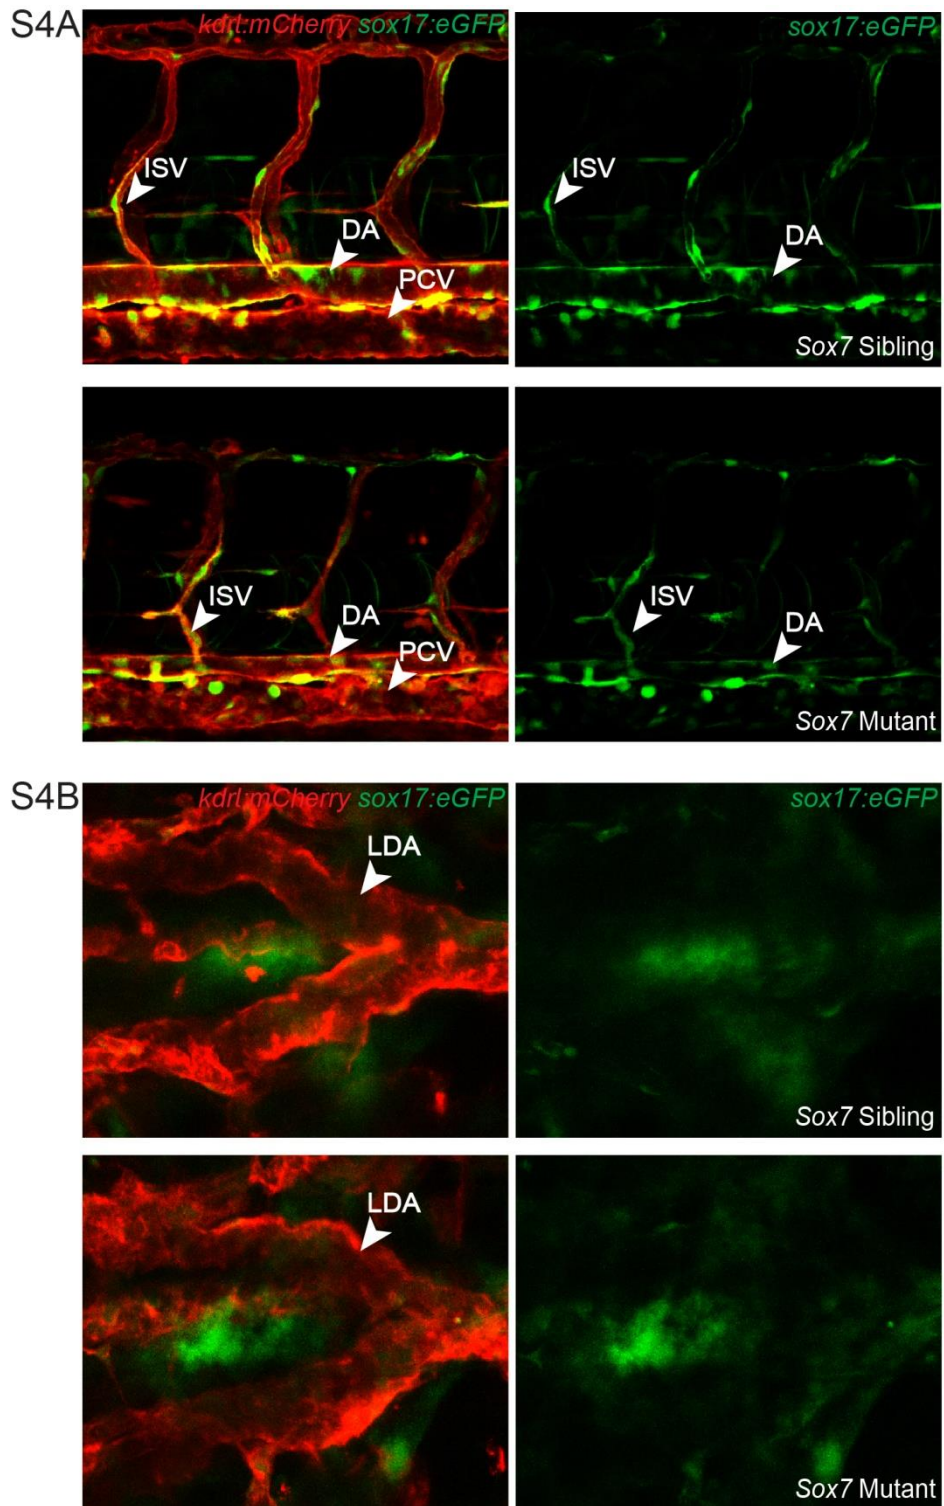

Fig. S5

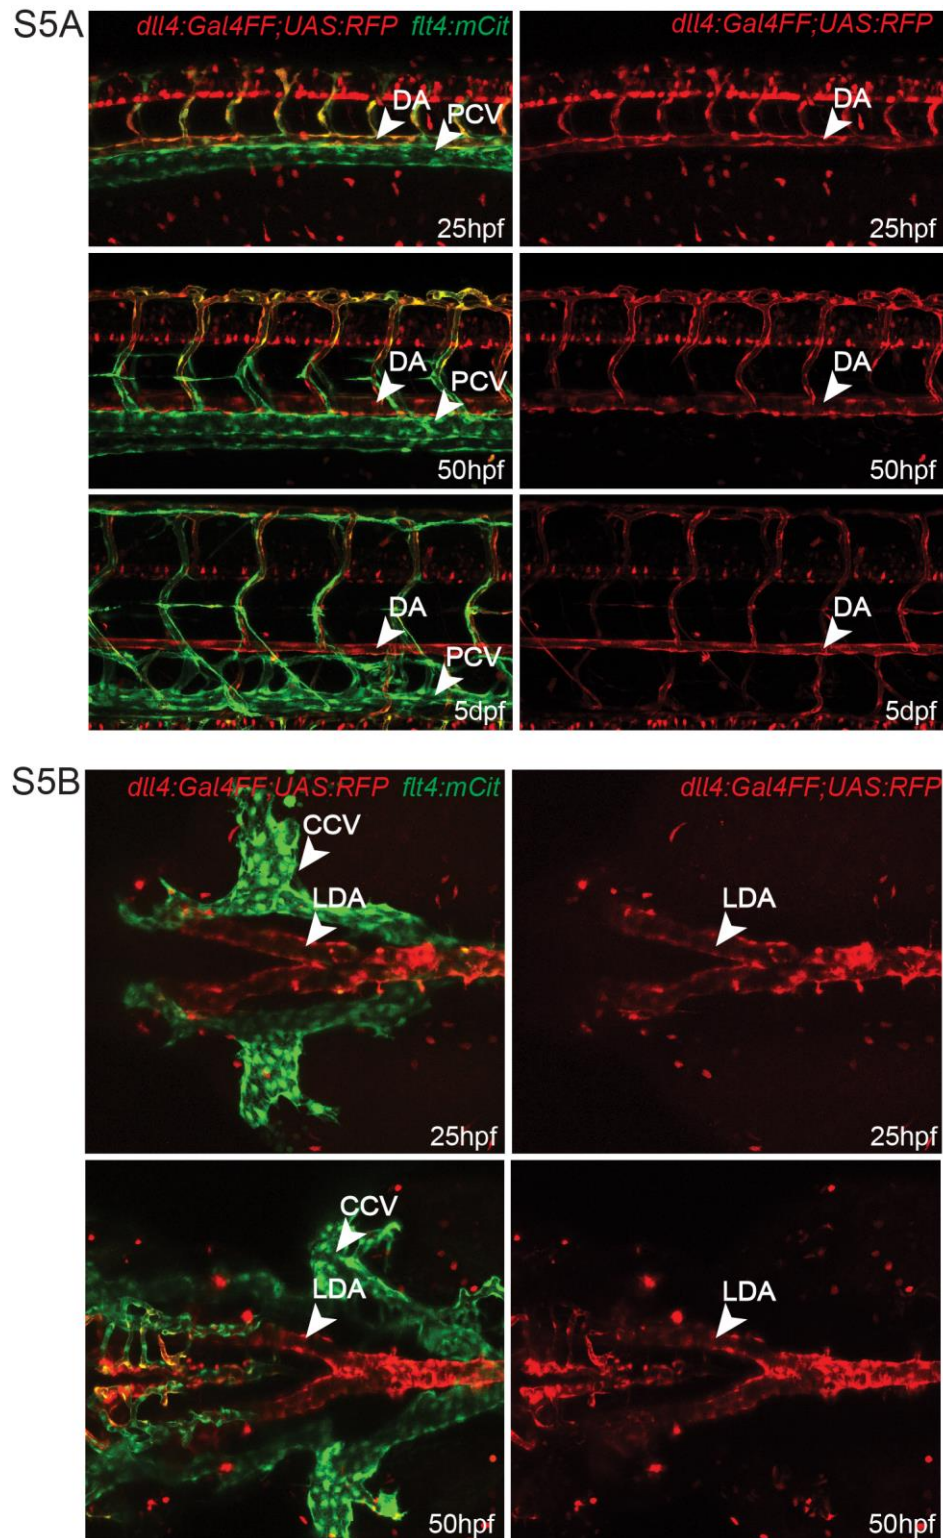

## Supplementary Movies

### Suppl. Movie 1

Movie 1A

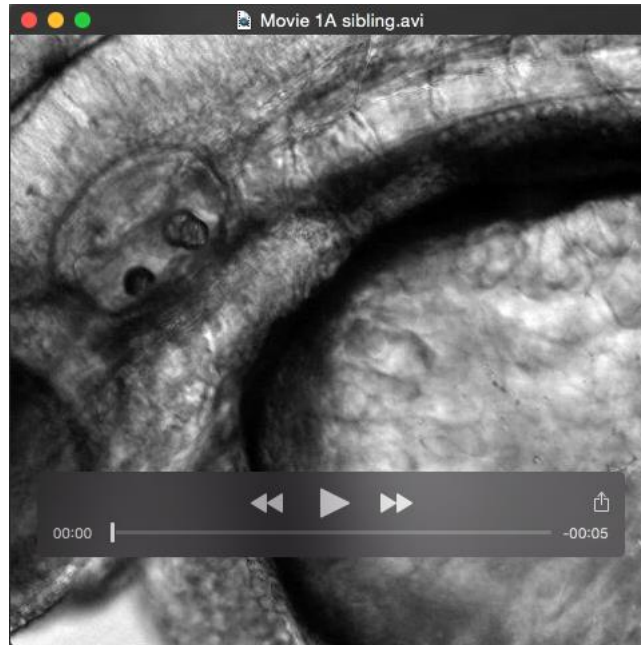

Movie 1B

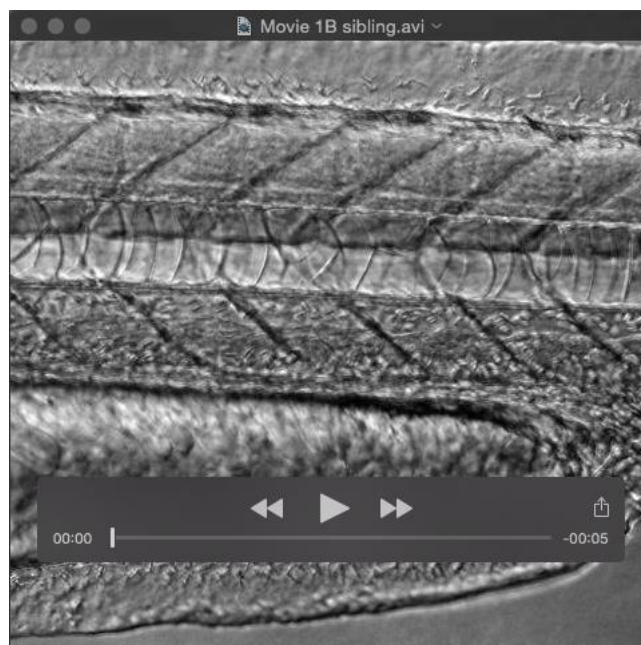

## Suppl. Movie 2

Movie 2A

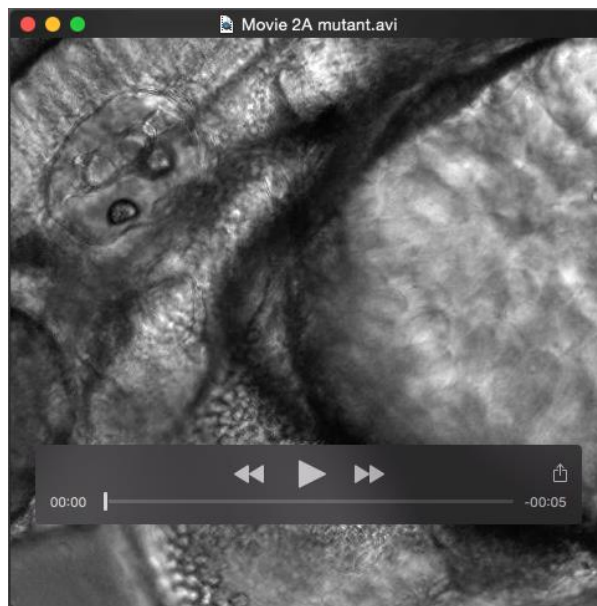

Movie 2B

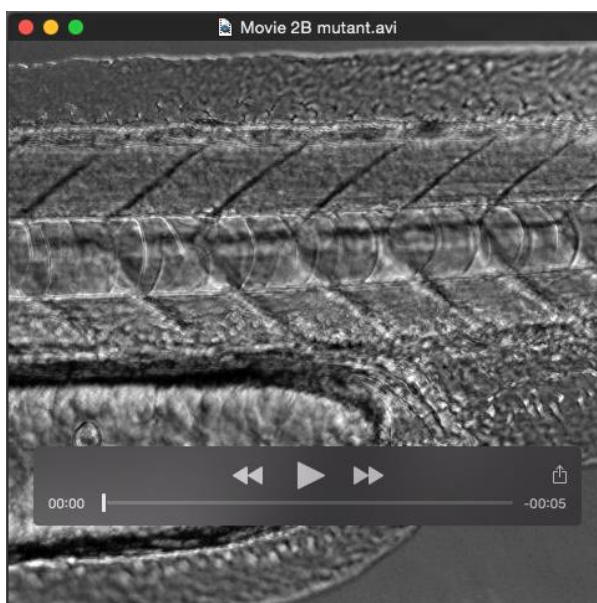



### Suppl. Movie 3

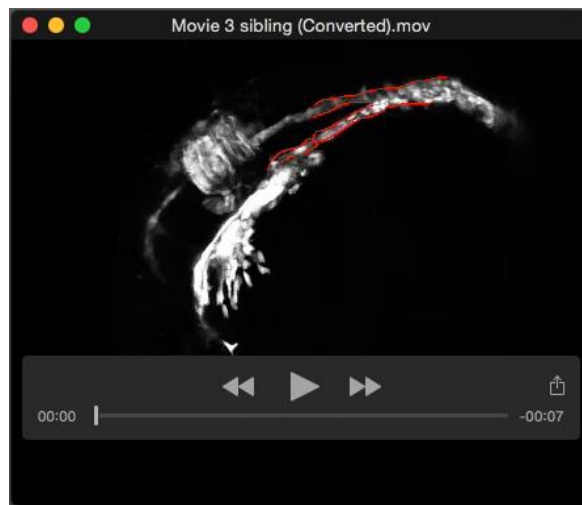

### Suppl. Movie 4

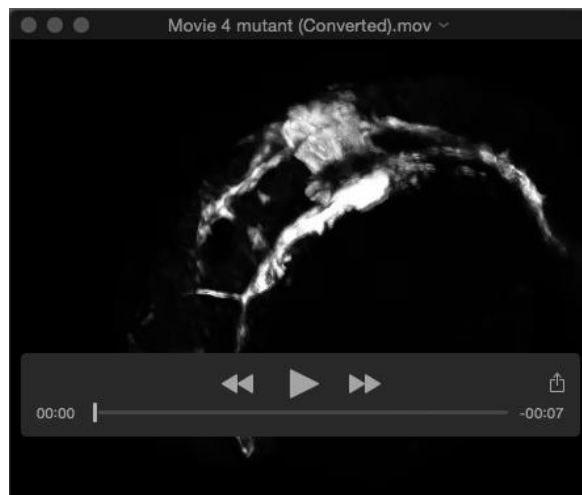

Supplement: dev117275supp.pdf [file dev117275supp.pdf]
